# Supplementary material for: Influence of Reagents on Qualitative Indicators of Artificial Anti-Deflationary Phytocenosis on Waste from a Rare Earth Tailing Facility
Source: MDPI journal article supplement (doi:10.3390/toxics11070629), 2023-07-20
Supplement: s1 [file s1]

## Supplementary Materials

Table S1. The results of one-way ANOVA

| Parametr               | Source of Variation | $p < 0.05$ |    |          |          |          |            | $p < 0.01$ |    |          |          |          |            |
|------------------------|---------------------|------------|----|----------|----------|----------|------------|------------|----|----------|----------|----------|------------|
|                        |                     | SS         | df | MS       | F        | P-value  | F critical | SS         | df | MS       | F        | P-value  | F critical |
| Aboveground biomass, g | Between groups      | 0.211627   | 4  | 0.052907 | 4.877689 | 0.019237 | 3.47805    | 0.211627   | 4  | 0.052907 | 4.877689 | 0.019237 | 5.994339   |
|                        | Within groups       | 0.108467   | 10 | 0.010847 |          |          |            | 0.108467   | 10 | 0.010847 |          |          |            |
|                        | Total               | 0.320093   | 14 |          |          |          |            | 0.320093   | 14 |          |          |          |            |
| Plant height, cm       | Between groups      | 201.7828   | 4  | 50.4457  | 27.70592 | 1.24E-11 | 2.578739   | 201.7828   | 4  | 50.4457  | 27.70592 | 1.24E-11 | 3.767427   |
|                        | Within groups       | 81.934     | 45 | 1.820756 |          |          |            | 81.934     | 45 | 1.820756 |          |          |            |
|                        | Total               | 283.7168   | 49 |          |          |          |            | 283.7168   | 49 |          |          |          |            |
| K                      | Between groups      | 77831208   | 4  | 19457802 | 228.1556 | 8.89E-10 | 3.47805    | 77831208   | 4  | 19457802 | 228.1556 | 8.89E-10 | 5.994339   |
|                        | Within groups       | 852830.2   | 10 | 85283.02 |          |          |            | 852830.2   | 10 | 85283.02 |          |          |            |
|                        | Total               | 78684038   | 14 |          |          |          |            | 78684038   | 14 |          |          |          |            |
| Na                     | Between groups      | 73248139   | 4  | 18312035 | 4820.413 | 2.24E-16 | 3.47805    | 73248139   | 4  | 18312035 | 4820.413 | 2.24E-16 | 5.994339   |
|                        | Within groups       | 37988.52   | 10 | 3798.852 |          |          |            | 37988.52   | 10 | 3798.852 |          |          |            |
|                        | Total               | 73286127   | 14 |          |          |          |            | 73286127   | 14 |          |          |          |            |
| Ca                     | Between groups      | 1661590    | 4  | 415397.5 | 439.4932 | 3.46E-11 | 3.47805    | 1661590    | 4  | 415397.5 | 439.4932 | 3.46E-11 | 5.994339   |
|                        | Within groups       | 9451.74    | 10 | 945.174  |          |          |            | 9451.74    | 10 | 945.174  |          |          |            |
|                        | Total               | 1671042    | 14 |          |          |          |            | 1671042    | 14 |          |          |          |            |
| Mg                     | Between groups      | 11885300   | 4  | 2971325  | 1752.849 | 3.51E-14 | 3.47805    | 11885300   | 4  | 2971325  | 1752.849 | 3.51E-14 | 5.994339   |
|                        | Within groups       | 16951.4    | 10 | 1695.14  |          |          |            | 16951.4    | 10 | 1695.14  |          |          |            |
|                        | Total               | 11902251   | 14 |          |          |          |            | 11902251   | 14 |          |          |          |            |
| Si                     | Between groups      | 54295426   | 4  | 13573857 | 880.0624 | 1.09E-12 | 3.47805    | 54295426   | 4  | 13573857 | 880.0624 | 1.09E-12 | 5.994339   |
|                        | Within groups       | 154237.4   | 10 | 15423.74 |          |          |            | 154237.4   | 10 | 15423.74 |          |          |            |
|                        | Total               | 54449663   | 14 |          |          |          |            | 54449663   | 14 |          |          |          |            |
| Al                     | Between groups      | 2493995    | 4  | 623498.9 | 2826.275 | 3.23E-15 | 3.47805    | 2493995    | 4  | 623498.9 | 2826.275 | 3.23E-15 | 5.994339   |
|                        | Within groups       | 2206.08    | 10 | 220.608  |          |          |            | 2206.08    | 10 | 220.608  |          |          |            |
|                        | Total               | 2496202    | 14 |          |          |          |            | 2496202    | 14 |          |          |          |            |
| Cu                     | Between groups      | 57.156     | 4  | 14.289   | 33.86019 | 8.69E-06 | 3.47805    | 57.156     | 4  | 14.289   | 33.86019 | 8.69E-06 | 5.994339   |
|                        | Within groups       | 4.22       | 10 | 0.422    |          |          |            | 4.22       | 10 | 0.422    |          |          |            |

|    |                |          |    |          |          |          |         |          |   |          |          |          |          |    |       |  |
|----|----------------|----------|----|----------|----------|----------|---------|----------|---|----------|----------|----------|----------|----|-------|--|
| Sr | Total          | 61.376   | 14 |          |          |          |         |          |   |          |          | 61.376   | 14       |    |       |  |
|    | Between groups | 2895.36  | 4  | 723.84   | 250.9847 | 5.55E-10 | 3.47805 | 2895.36  | 4 | 723.84   | 250.9847 | 5.55E-10 | 5.994339 |    |       |  |
|    | Within groups  | 28.84    | 10 | 2.884    |          |          |         |          |   |          |          |          | 28.84    | 10 | 2.884 |  |
| Mn | Total          | 2924.2   | 14 |          |          |          |         |          |   |          |          | 2924.2   | 14       |    |       |  |
|    | Between groups | 2943.336 | 4  | 735.834  | 273.1381 | 3.65E-10 | 3.47805 | 2943.336 | 4 | 735.834  | 273.1381 | 3.65E-10 | 5.994339 |    |       |  |
|    | Within groups  | 26.94    | 10 | 2.694    |          |          |         |          |   |          |          |          | 26.94    | 10 | 2.694 |  |
| Zn | Total          | 2970.276 | 14 |          |          |          |         |          |   |          |          | 2970.276 | 14       |    |       |  |
|    | Between groups | 116.484  | 4  | 29.121   | 49.19088 | 1.52E-06 | 3.47805 | 116.484  | 4 | 29.121   | 49.19088 | 1.52E-06 | 5.994339 |    |       |  |
|    | Within groups  | 5.92     | 10 | 0.592    |          |          |         |          |   |          |          |          | 5.92     | 10 | 0.592 |  |
| La | Total          | 122.404  | 14 |          |          |          |         |          |   |          |          | 122.404  | 14       |    |       |  |
|    | Between groups | 1302.147 | 4  | 325.5368 | 856.6759 | 1.25E-12 | 3.47805 | 1302.147 | 4 | 325.5368 | 856.6759 | 1.25E-12 | 5.994339 |    |       |  |
|    | Within groups  | 3.8      | 10 | 0.38     |          |          |         |          |   |          |          |          | 3.8      | 10 | 0.38  |  |
| Ce | Total          | 1305.947 | 14 |          |          |          |         |          |   |          |          | 1305.947 | 14       |    |       |  |
|    | Between groups | 7816.689 | 4  | 1954.172 | 2406.616 | 7.21E-15 | 3.47805 | 7816.689 | 4 | 1954.172 | 2406.616 | 7.21E-15 | 5.994339 |    |       |  |
|    | Within groups  | 8.12     | 10 | 0.812    |          |          |         |          |   |          |          |          | 8.12     | 10 | 0.812 |  |
|    | Total          | 7824.809 | 14 |          |          |          |         |          |   |          |          | 7824.809 | 14       |    |       |  |

Table S2. The results of Tukey's test.

| a) $p < 0.05$          | $q_{\text{critical value}} = 4.654$ | $q_{\text{critical value}} = 4.018$ | $q_{\text{critical value}} = 4.654$ |        |       |        |       |        |       |       |       |       |       |        |
|------------------------|-------------------------------------|-------------------------------------|-------------------------------------|--------|-------|--------|-------|--------|-------|-------|-------|-------|-------|--------|
| Group pairs            | Aboveground biomass, g              | Plant height, cm                    | K                                   | Na     | Ca    | Mg     | Si    | Al     | Cu    | Sr    | Mn    | Zn    | La    | Ce     |
| Control vs Variant 1   | 1.83                                | 8.20                                | 4.90                                | 143.83 | 33.09 | 55.90  | 3.94  | 47.86  | 13.06 | 4.08  | 14.67 | 10.13 | 15.57 | 27.14  |
| Control vs Variant 2   | 4.32                                | 11.98                               | 6.83                                | 158.32 | 55.52 | 82.60  | 25.69 | 110.72 | 8.53  | 27.95 | 15.72 | 6.30  | 71.37 | 118.92 |
| Control vs Variant 3   | 4.99                                | 12.77                               | 25.73                               | 173.32 | 13.53 | 66.66  | 39.80 | 135.40 | 1.33  | 22.03 | 19.94 | 16.88 | 44.51 | 74.67  |
| Control vs Variant 4   | 4.99                                | 11.48                               | 14.62                               | 121.89 | 28.16 | 113.97 | 72.88 | 67.58  | 0.53  | 6.12  | 45.48 | 15.98 | 9.69  | 14.07  |
| Variant 1 vs Variant 2 | 2.33                                | 3.77                                | 11.74                               | 14.49  | 22.43 | 26.71  | 21.74 | 62.87  | 4.53  | 32.03 | 1.06  | 3.83  | 55.80 | 91.78  |
| Variant 1 vs Variant 3 | 3.16                                | 4.57                                | 30.63                               | 29.50  | 19.56 | 10.76  | 35.86 | 87.54  | 11.73 | 26.11 | 5.28  | 6.75  | 28.94 | 47.53  |
| Variant 1 vs Variant 4 | 3.16                                | 3.28                                | 9.72                                | 21.93  | 4.93  | 58.07  | 68.93 | 19.72  | 12.53 | 2.04  | 30.81 | 5.85  | 5.87  | 13.07  |
| Variant 2 vs Variant 3 | 0.67                                | 0.80                                | 18.90                               | 15.00  | 41.99 | 15.94  | 14.12 | 24.68  | 7.20  | 5.92  | 4.22  | 10.58 | 26.86 | 44.25  |
| Variant 2 vs Variant 4 | 0.67                                | 0.49                                | 21.46                               | 36.43  | 27.36 | 31.37  | 47.19 | 43.15  | 8.00  | 34.07 | 29.76 | 9.68  | 61.67 | 104.85 |
| Variant 3 vs Variant 4 | 0.00                                | 1.29                                | 40.35                               | 51.43  | 14.63 | 47.31  | 33.08 | 67.82  | 0.80  | 28.15 | 25.54 | 0.90  | 34.81 | 60.60  |
| b) $p < 0.01$          | $q_{\text{critical value}} = 6.136$ | $q_{\text{critical value}} = 4.874$ | $q_{\text{critical value}} = 6.136$ |        |       |        |       |        |       |       |       |       |       |        |
| Group pairs            | Aboveground biomass, g              | Plant height, cm                    | K                                   | Na     | Ca    | Mg     | Si    | Al     | Cu    | Sr    | Mn    | Zn    | La    | Ce     |
| Control vs Variant 1   | 1.83                                | 8.20                                | 4.90                                | 143.83 | 33.09 | 55.90  | 3.94  | 47.86  | 13.06 | 4.08  | 14.67 | 10.13 | 15.57 | 27.14  |
| Control vs Variant 2   | 4.32                                | 11.98                               | 6.83                                | 158.32 | 55.52 | 82.60  | 25.69 | 110.72 | 8.53  | 27.95 | 15.72 | 6.30  | 71.37 | 118.92 |

|                        |      |              |              |               |              |               |              |               |              |              |              |              |              |               |
|------------------------|------|--------------|--------------|---------------|--------------|---------------|--------------|---------------|--------------|--------------|--------------|--------------|--------------|---------------|
| Control vs Variant 3   | 4.99 | <b>12.77</b> | <b>25.73</b> | <b>173.32</b> | <b>13.53</b> | <b>66.66</b>  | <b>39.80</b> | <b>135.40</b> | 1.33         | <b>22.03</b> | <b>19.94</b> | <b>16.88</b> | <b>44.51</b> | <b>74.67</b>  |
| Control vs Variant 4   | 4.99 | <b>11.48</b> | <b>14.62</b> | <b>121.89</b> | <b>28.16</b> | <b>113.97</b> | <b>72.88</b> | <b>67.58</b>  | 0.53         | 6.12         | <b>45.48</b> | <b>15.98</b> | <b>9.69</b>  | <b>14.07</b>  |
| Variant 1 vs Variant 2 | 2.33 | 3.77         | <b>11.74</b> | <b>14.49</b>  | <b>22.43</b> | <b>26.71</b>  | <b>21.74</b> | <b>62.87</b>  | 4.53         | <b>32.03</b> | 1.06         | 3.83         | <b>55.80</b> | <b>91.78</b>  |
| Variant 1 vs Variant 3 | 3.16 | 4.57         | <b>30.63</b> | <b>29.50</b>  | <b>19.56</b> | <b>10.76</b>  | <b>35.86</b> | <b>87.54</b>  | <b>11.73</b> | <b>26.11</b> | <b>5.28</b>  | <b>6.75</b>  | <b>28.94</b> | <b>47.53</b>  |
| Variant 1 vs Variant 4 | 3.16 | 3.28         | <b>9.72</b>  | <b>21.93</b>  | 4.93         | <b>58.07</b>  | <b>68.93</b> | <b>19.72</b>  | <b>12.53</b> | 2.04         | <b>30.81</b> | 5.85         | 5.87         | <b>13.07</b>  |
| Variant 2 vs Variant 3 | 0.67 | 0.80         | <b>18.90</b> | <b>15.00</b>  | <b>41.99</b> | <b>15.94</b>  | <b>14.12</b> | <b>24.68</b>  | <b>7.20</b>  | <b>5.92</b>  | 4.22         | <b>10.58</b> | <b>26.86</b> | <b>44.25</b>  |
| Variant 2 vs Variant 4 | 0.67 | 0.49         | <b>21.46</b> | <b>36.43</b>  | <b>27.36</b> | <b>31.37</b>  | <b>47.19</b> | <b>43.15</b>  | <b>8.00</b>  | <b>34.07</b> | <b>29.76</b> | <b>9.68</b>  | <b>61.67</b> | <b>104.85</b> |
| Variant 3 vs Variant 4 | 0.00 | 1.29         | <b>40.35</b> | <b>51.43</b>  | <b>14.63</b> | <b>47.31</b>  | <b>33.08</b> | <b>67.82</b>  | 0.80         | <b>28.15</b> | <b>25.54</b> | 0.90         | <b>34.81</b> | <b>60.60</b>  |

The calculated values of the q-criterion exceeding the critical values are high-lighted in bold.
